# Supplementary material for: Symptom-based early-stage differentiation between SARS-CoV-2 versus other respiratory tract infections—Upper Silesia pilot study
Source: PubMed Central journal article supplement (PMC8245528; doi:10.1038/s41598-021-93046-6), 2021-06-30
Supplement: 41598_2021_93046_MOESM2_ESM.pdf [file 41598_2021_93046_MOESM2_ESM.pdf]

## SUPPLEMENTARY MATERIALS

### **Symptom based early stage differentiation between SARS-CoV-2 versus other respiratory tract infections - Upper Silesia pilot study**

Justyna Mika<sup>1</sup>, Joanna Tobiasz<sup>1</sup>, Joanna Zyla<sup>1</sup>, Anna Papiez<sup>1</sup>, Małgorzata Bach<sup>2</sup>, Aleksandra Werner<sup>2</sup>, Michał Kozielski<sup>3</sup>, Mateusz Kania<sup>4</sup>, Aleksandra Gruca<sup>3</sup>, Damian Piotrowski<sup>5</sup>, Barbara Sobala-Szczygieł<sup>5</sup>, Bożena Włostowska<sup>5</sup>, Paweł Foszner<sup>4</sup>, Marek Sikora<sup>3</sup>, Joanna Polanska<sup>1\*</sup>, Jerzy Jaroszewicz<sup>5</sup>

<sup>1</sup>Department of Data Science and Engineering, Silesian University of Technology, Gliwice, Poland,

<sup>2</sup>Department of Applied Informatics, Silesian University of Technology, Gliwice, Poland,

<sup>3</sup>Department of Computer Networks and Systems, Silesian University of Technology, Gliwice, Poland,

<sup>4</sup>Department of Graphics, Computer Vision and Digital Systems, Silesian University of Technology, Gliwice, Poland,

<sup>5</sup>Department of Infectious Diseases and Hepatology, Medical University of Silesia, Katowice, Poland

\*corresponding author: joanna.polanska@polsl.pl

## Supplementary figure legends

**Fig. S1. The distribution of missing values across sample.**

**Fig. S2. Frequency of patients observing one symptom or a combination of symptoms regarding the total number of patients from a certain group (infected or not infected with SARS-CoV-2) who answered all eight analysed queries.** Dots in the lower part indicate which symptom or a list of symptoms is shown by the bars in the upper part of the plot. For example: almost 4% of patients with negative COVID-19 diagnosis reported only high temperature (and not cough, muscle aches, headache, sore throat, loss of taste/smell, dyspnea or dizziness), whereas from the group of patients with positive diagnosis, about 1% of patients reported only high temperature. Significant odds ratio were coloured green. Combinations of symptoms with frequencies  $< 0.01$  were not shown here.

**Fig. S3. Heatmaps with correlation coefficients for pairwise comparison of queries. Blood type was ignored due to different interpretation of effect size coefficient.** Comparisons with at least small effect size have been coloured, i.e. values of correlation within the range  $(-0.1, 0.1)$  were not coloured. Panel a shows heatmaps for men and women. Panel b shows heatmaps for two age subsets (younger and older than 46 years).

**Fig. S4. Frequency of patients observing one symptom or a combination of symptoms regarding the total number of patients from a certain group (infected or not infected with SARS-CoV-2) who answered all four analysed queries, considered men and women separately.** Dots in the middle part indicate which symptom or combination of symptoms the bars in the upper part of the plot refer to. The lower part of the plot shows odds ratio with 95% confidence intervals for comparison of SARS-CoV-2 diagnosis with a corresponding symptom or symptoms combination. The red line shows the level of odds ratio equal to 1. Significant odds ratio were coloured green. The odds ratio is significant if the confidence interval does not include the value of 1 (red line).

**Fig. S5. Venn diagrams showing co-occurrence of four main symptoms among people infected with SARS-CoV-2.** Colour scale shows the frequency of symptoms ranging from small frequency (white) to high frequency (red). Panel a – Venn diagrams for men and women separately. Panel b – Venn diagrams for younger and older subsets of patients.

**Supplementary tables:**

**Table S1.** The detailed characterisation of the sample.

**Table S2.** The quality indices for logistic-regression-based predictors of the early-stage SARS-CoV-2 infection for the chosen subsets of the nine main symptoms (10-fold cross-validation).

**Table S3.** The sex- and age-dependent prevalence of studied symptoms among patients positive and negative for SARS-CoV-2.

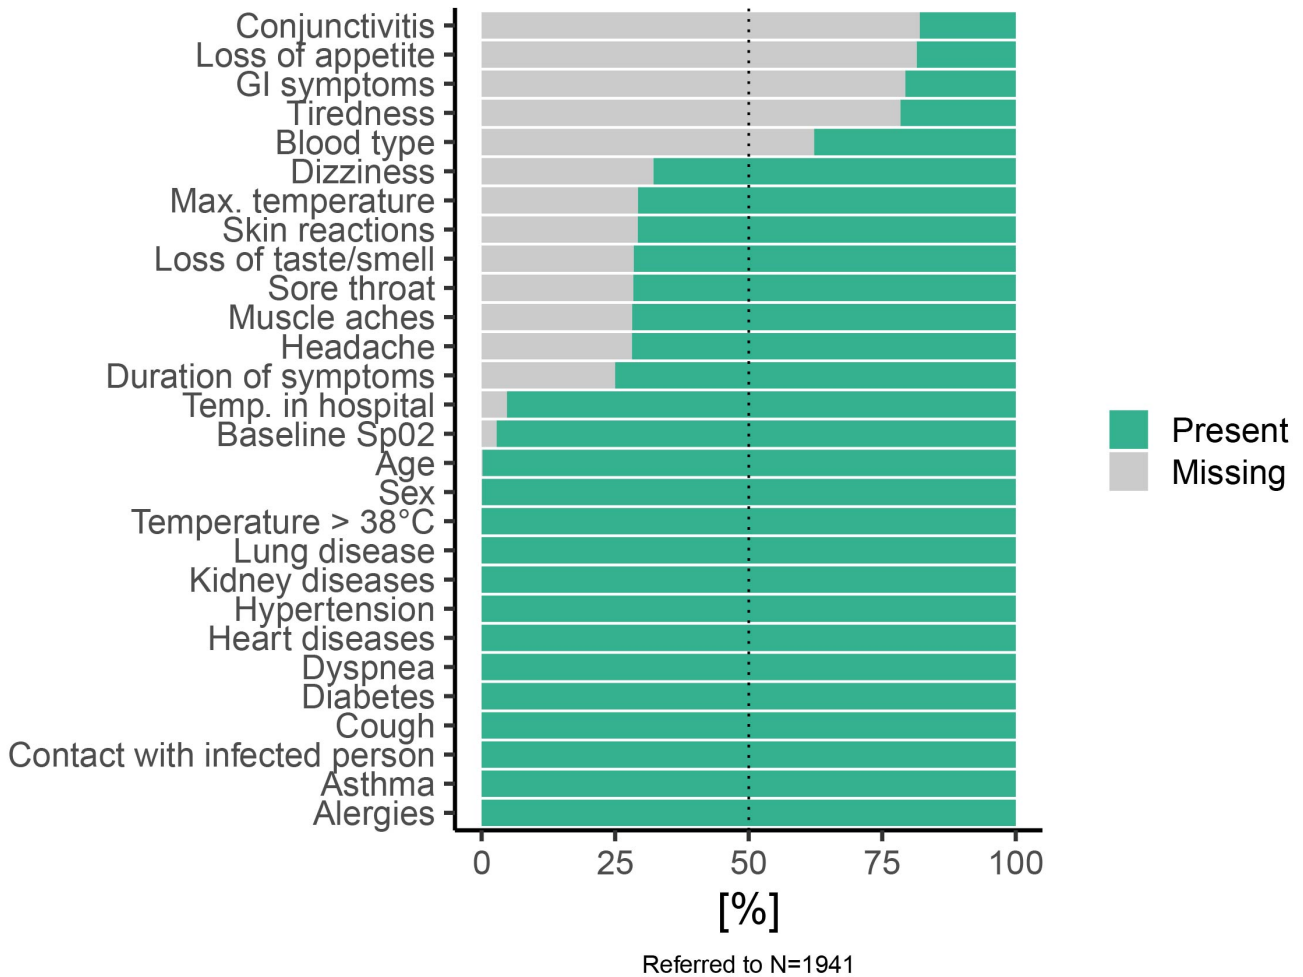

SARS-CoV-2(-) N=847 SARS-CoV-2(+) N=462

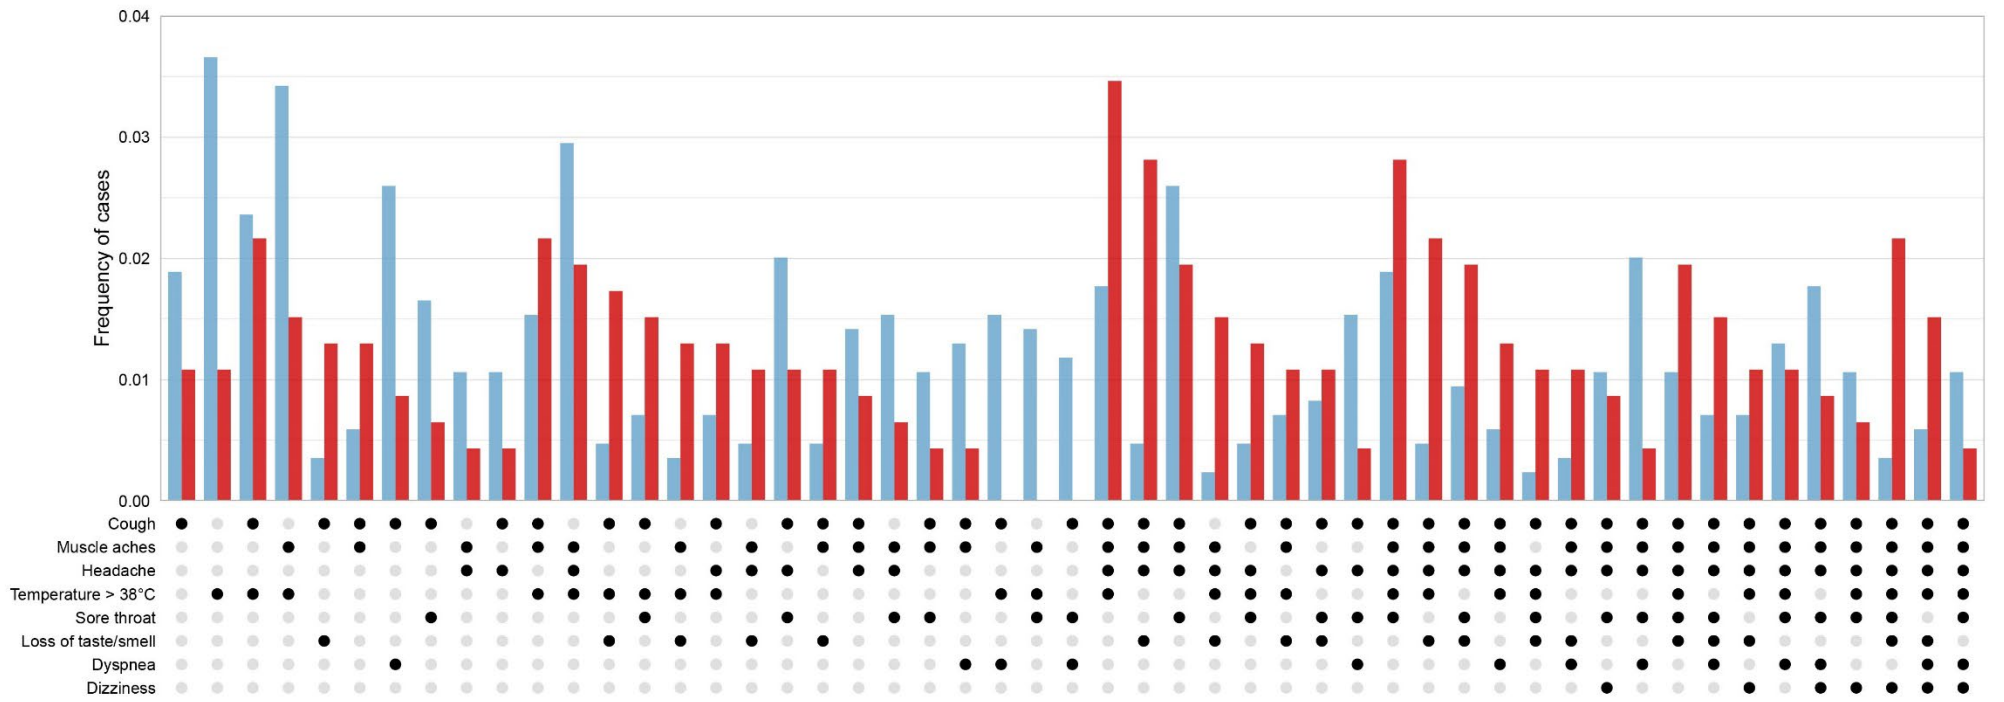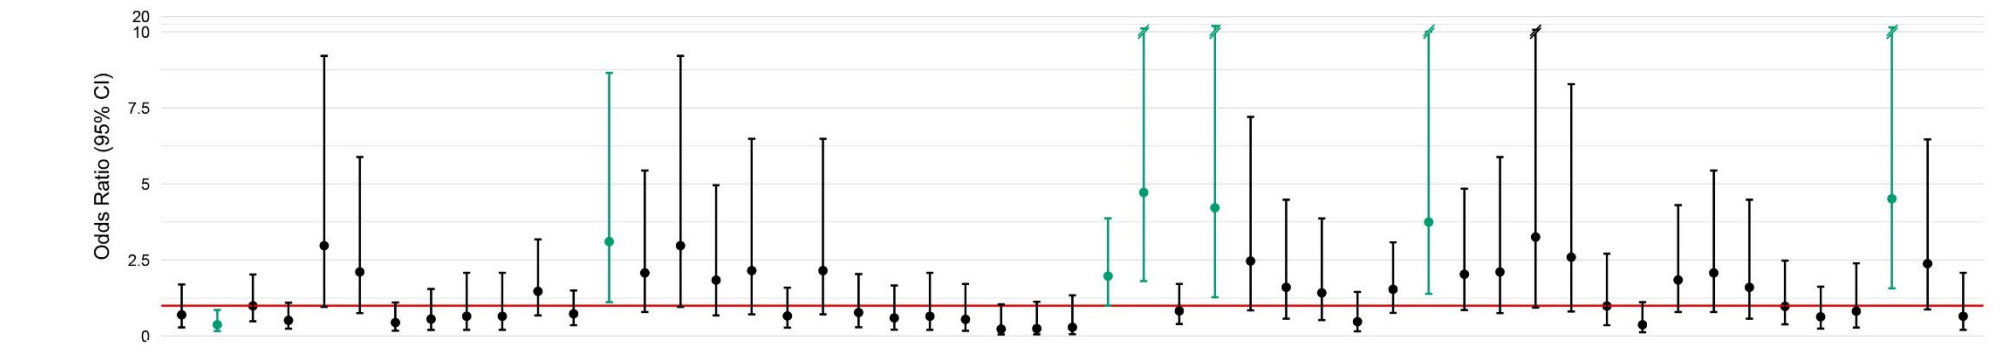

N is the number of patients who answered the questions.

**a**

MEN (N=279)

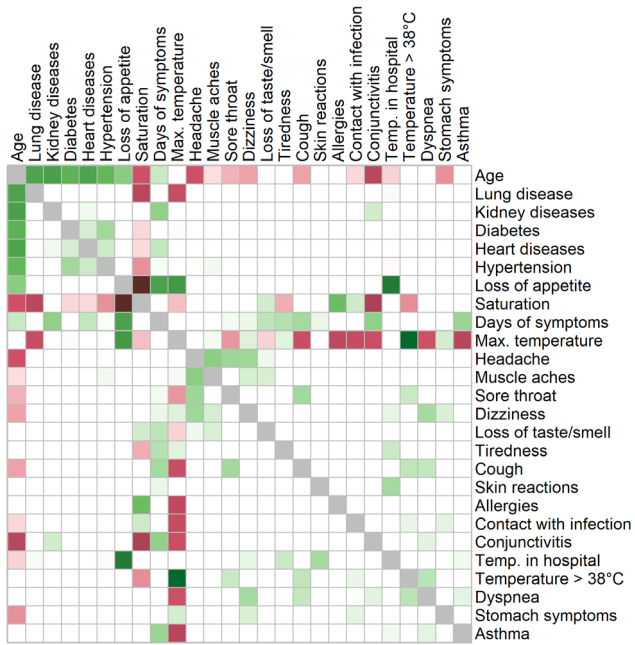

WOMEN (N=205)

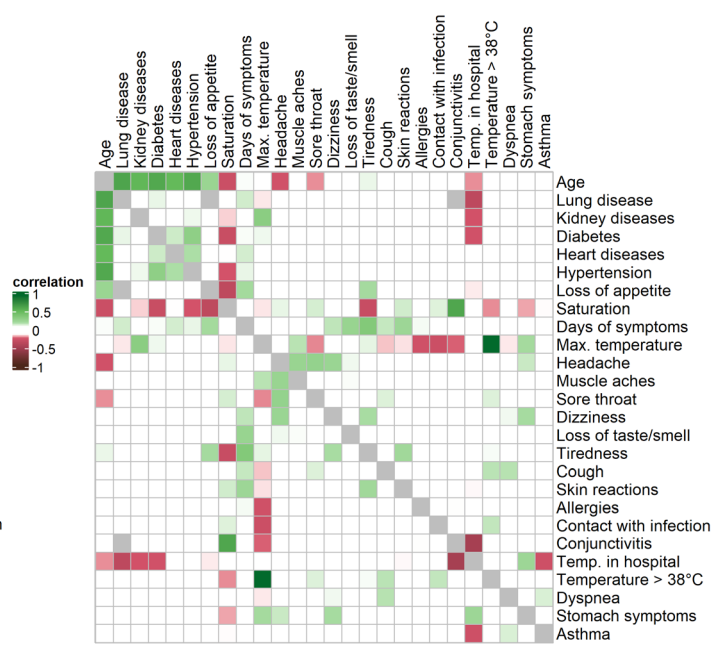**b**

AGE ≤ 46 years (N=305)

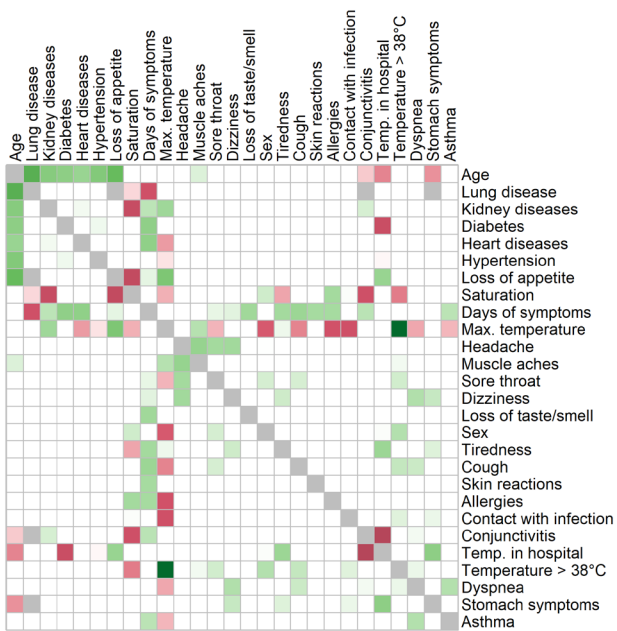

AGE &gt; 46 years (N=178)

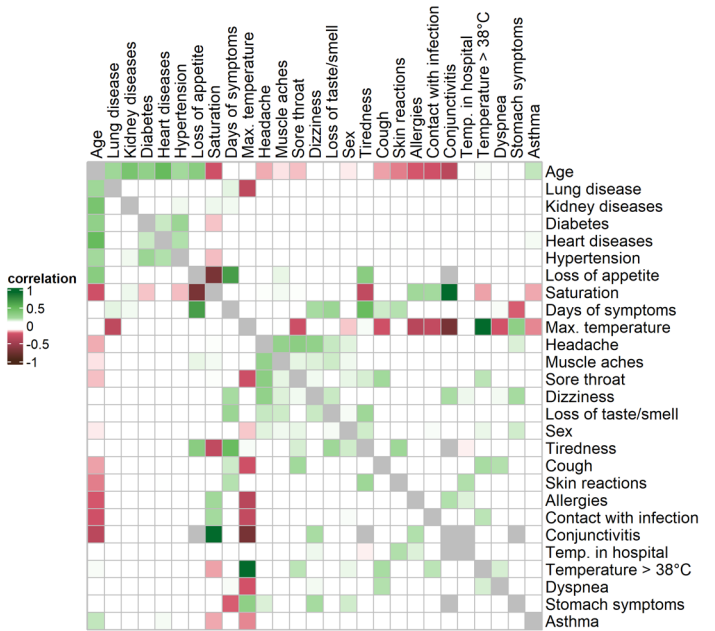

### MEN

SARS-CoV-2(-) N=461    SARS-CoV-2(+) N=279

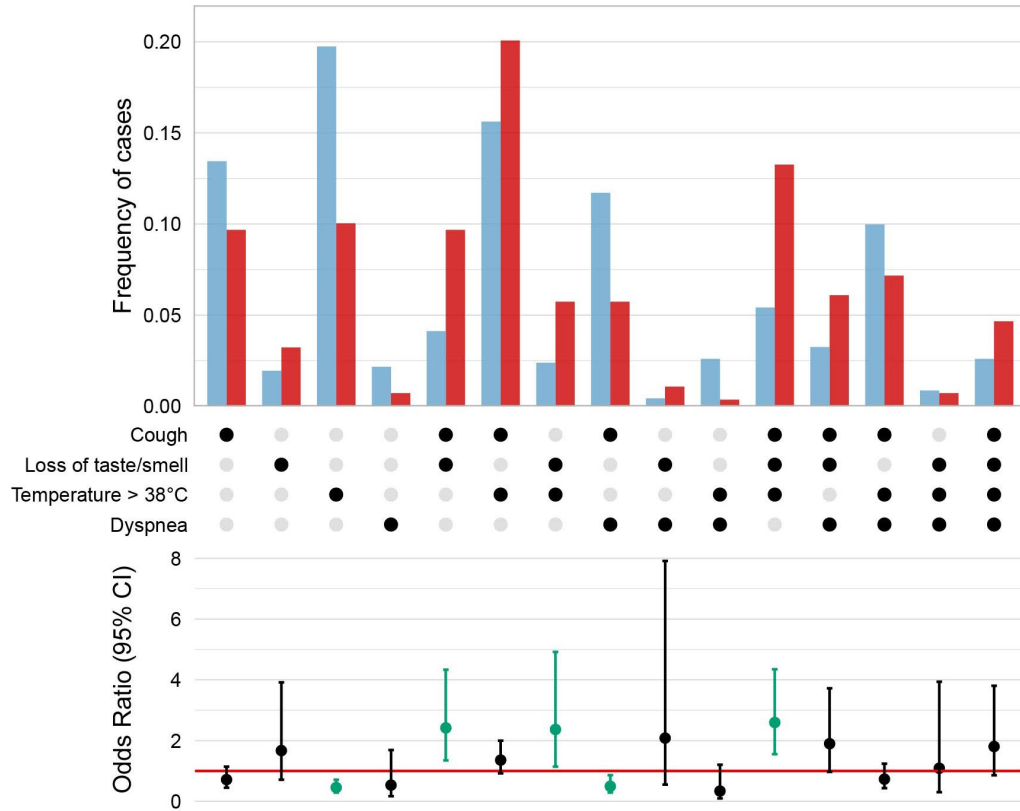

### WOMEN

SARS-CoV-2(-) N=443    SARS-CoV-2(+) N=205

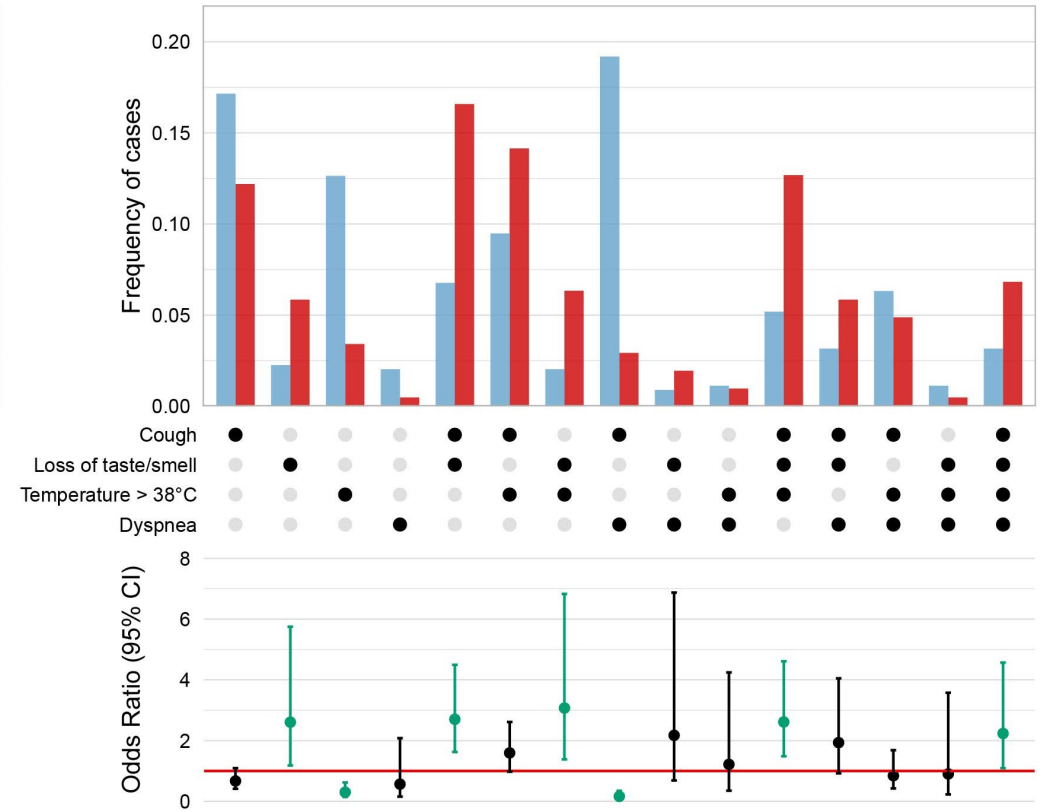

N is a number of people who answered the questions

**a**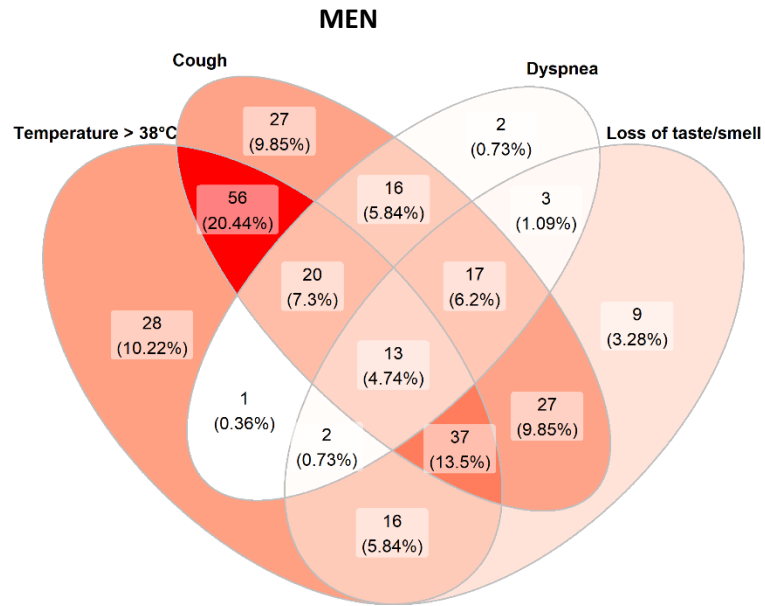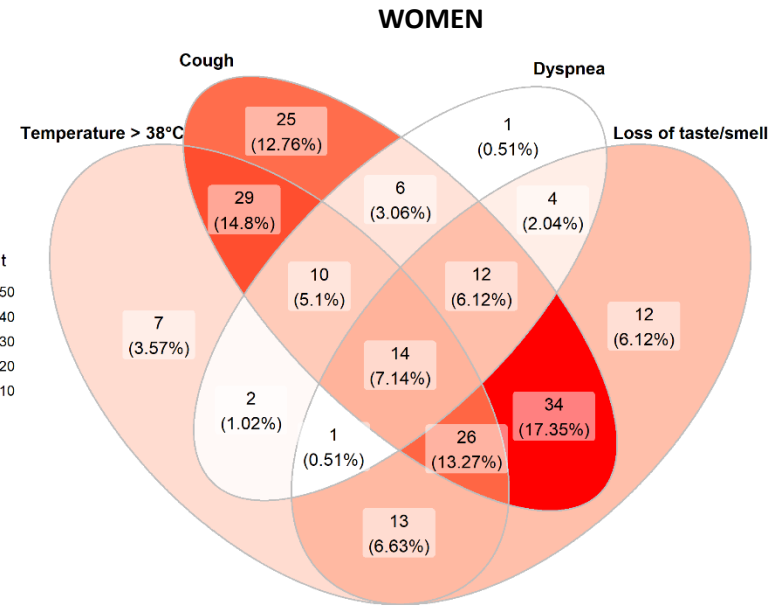**b**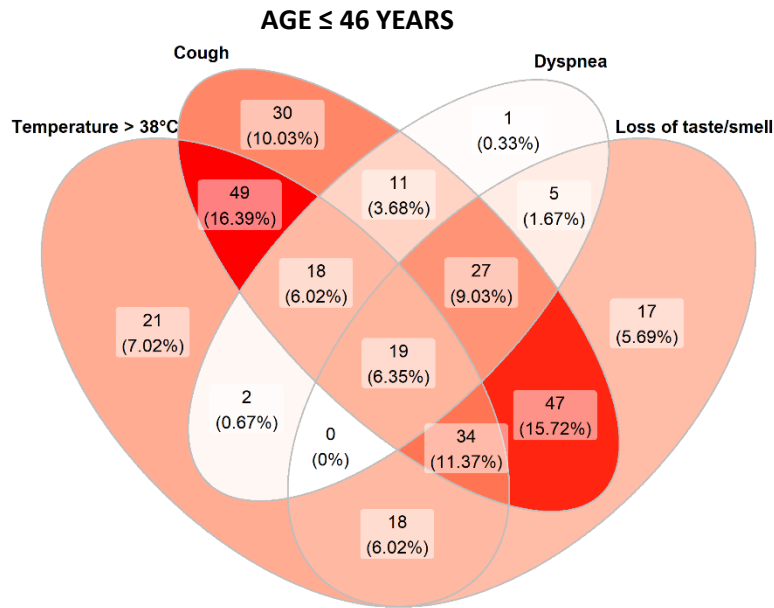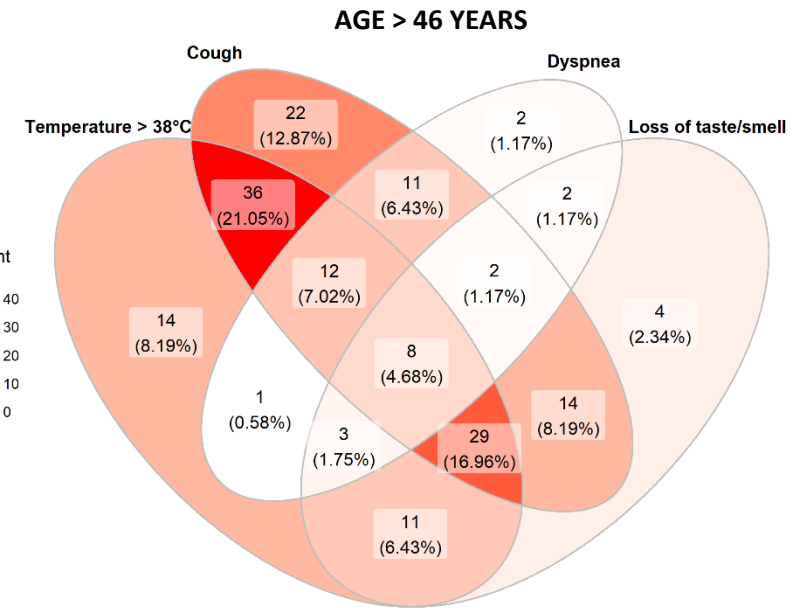



Sample N = 3114

Continuous variables:

|                   | N    | Mean  | SD    | Median | Q1 [25%] | Q3 [75%] | Min  | Max  | no. of missing data |
|-------------------|------|-------|-------|--------|----------|----------|------|------|---------------------|
| Age               | 3111 | 43,29 | 14,45 | 42     | 32       | 54       | 1    | 98   | 3                   |
| Saturation        | 3006 | 97,20 | 1,32  | 97     | 97       | 98       | 88   | 100  | 108                 |
| Temp. in hospital | 2976 | 36,47 | 0,46  | 36,5   | 36,3     | 36,6     | 33,9 | 40,2 | 138                 |
| Max. temperature  | 1916 | 37,68 | 1,05  | 37,7   | 37       | 38,5     | 30,9 | 41,2 | 1198                |
| Days of symptoms  | 1827 | 5,35  | 8,03  | 4      | 2        | 7        | 0    | 180  | 1287                |

Discrete variables:

|                        | Yes  | No   | N    | no. of missing data | Yes [% of N] | No [% of N] |
|------------------------|------|------|------|---------------------|--------------|-------------|
| Sex                    | 1559 | 1554 | 3113 | 1                   | 50,08        | 49,92       |
| Number of infections   | 759  | 2355 | 3114 | 0                   | 24,37        | 75,63       |
| Health state           | 1941 | 1173 | 3114 | 0                   | 62,33        | 37,67       |
| Contact with infection | 1227 | 1785 | 3012 | 102                 | 40,74        | 59,26       |
| Temperature > 38       | 931  | 2183 | 3114 | 0                   | 29,90        | 70,10       |
| Cough                  | 1588 | 1526 | 3114 | 0                   | 51,00        | 49,00       |
| Dyspnea                | 724  | 2390 | 3114 | 0                   | 23,25        | 76,75       |
| Conjunctivitis         | 9    | 740  | 749  | 2365                | 1,20         | 98,80       |
| Muscle aches           | 958  | 1288 | 2246 | 868                 | 42,65        | 57,35       |
| Loss of taste/smell    | 519  | 1725 | 2244 | 870                 | 23,13        | 76,87       |
| Sore throat            | 679  | 1566 | 2245 | 869                 | 30,24        | 69,76       |
| Tiredness              | 83   | 749  | 832  | 2282                | 9,98         | 90,02       |
| Headache               | 971  | 1278 | 2249 | 865                 | 43,17        | 56,83       |
| Dizziness              | 348  | 1703 | 2051 | 1063                | 16,97        | 83,03       |
| Skin reactions         | 60   | 2163 | 2223 | 891                 | 2,70         | 97,30       |
| Stomach symptoms       | 46   | 785  | 831  | 2283                | 5,54         | 94,46       |
| Loss of appetite       | 8    | 762  | 770  | 2344                | 1,04         | 98,96       |
| Lung disease           | 47   | 3067 | 3114 | 0                   | 1,51         | 98,49       |
| Hypertension           | 533  | 2581 | 3114 | 0                   | 17,12        | 82,88       |
| Heart diseases         | 163  | 2951 | 3114 | 0                   | 5,23         | 94,77       |
| Diabetes               | 133  | 2981 | 3114 | 0                   | 4,27         | 95,73       |
| Kidney diseases        | 34   | 3080 | 3114 | 0                   | 1,09         | 98,91       |
| Allergies              | 84   | 3030 | 3114 | 0                   | 2,70         | 97,30       |
| Asthma                 | 133  | 2981 | 3114 | 0                   | 4,27         | 95,73       |

| Blood type:        | n    | % of N |
|--------------------|------|--------|
| 0                  | 470  | 39,13  |
| A                  | 407  | 33,89  |
| AB                 | 115  | 9,58   |
| B                  | 209  | 17,4   |
| N                  | 1201 | 100    |
| no.of missing data | 1913 |        |



| characteristics              | All        |                                       |                                       | Women      |                                       |                                       | Men        |                                       |                                       | Young      |                                       |                                       | Old        |                                       |                                       |
|------------------------------|------------|---------------------------------------|---------------------------------------|------------|---------------------------------------|---------------------------------------|------------|---------------------------------------|---------------------------------------|------------|---------------------------------------|---------------------------------------|------------|---------------------------------------|---------------------------------------|
|                              | Odds Ratio | 95% Confidence Interval - Lower Bound | 95% Confidence Interval - Upper Bound | Odds Ratio | 95% Confidence Interval - Lower Bound | 95% Confidence Interval - Upper Bound | Odds Ratio | 95% Confidence Interval - Lower Bound | 95% Confidence Interval - Upper Bound | Odds Ratio | 95% Confidence Interval - Lower Bound | 95% Confidence Interval - Upper Bound | Odds Ratio | 95% Confidence Interval - Lower Bound | 95% Confidence Interval - Upper Bound |
| Sex *                        | 0,870      | 0,710                                 | 1,050                                 | -          | -                                     | -                                     | -          | -                                     | -                                     | 0,729      | 0,567                                 | 0,937                                 | 1,102      | 0,806                                 | 1,505                                 |
| Contact with infected person | 1,790      | 1,450                                 | 2,210                                 | 1,650      | 1,220                                 | 2,240                                 | 1,970      | 1,470                                 | 2,660                                 | 1,890      | 1,440                                 | 2,460                                 | 1,680      | 1,190                                 | 2,370                                 |
| Temperature > 38oC           | 1,670      | 1,370                                 | 2,030                                 | 1,780      | 1,340                                 | 2,370                                 | 1,530      | 1,170                                 | 2,010                                 | 1,530      | 1,190                                 | 1,960                                 | 1,930      | 1,400                                 | 2,650                                 |
| Cough                        | 1,260      | 1,000                                 | 1,580                                 | 1,120      | 0,800                                 | 1,570                                 | 1,410      | 1,040                                 | 1,920                                 | 1,140      | 0,850                                 | 1,540                                 | 1,480      | 1,040                                 | 2,110                                 |
| Dyspnea                      | 0,550      | 0,440                                 | 0,680                                 | 0,520      | 0,380                                 | 0,710                                 | 0,580      | 0,430                                 | 0,770                                 | 0,560      | 0,430                                 | 0,730                                 | 0,530      | 0,370                                 | 0,770                                 |
| Conjunctivitis               | 0,240      | 0,050                                 | 1,140                                 | 0,550      | 0,110                                 | 2,910                                 | 0,310      | 0,060                                 | 1,660                                 | 0,280      | 0,060                                 | 1,410                                 | 0,630      | 0,110                                 | 3,670                                 |
| Muscle aches                 | 1,300      | 1,030                                 | 1,630                                 | 1,200      | 0,850                                 | 1,690                                 | 1,420      | 1,040                                 | 1,920                                 | 1,730      | 1,280                                 | 2,350                                 | 0,860      | 0,600                                 | 1,230                                 |
| Loss of taste/smell          | 3,330      | 2,630                                 | 4,220                                 | 3,990      | 2,810                                 | 5,670                                 | 3,000      | 2,170                                 | 4,160                                 | 3,900      | 2,890                                 | 5,260                                 | 2,560      | 1,730                                 | 3,790                                 |
| Sore throat                  | 0,850      | 0,680                                 | 1,070                                 | 0,660      | 0,470                                 | 0,920                                 | 1,130      | 0,830                                 | 1,540                                 | 0,700      | 0,530                                 | 0,930                                 | 1,210      | 0,830                                 | 1,760                                 |
| Tiredness                    | 0,540      | 0,320                                 | 0,930                                 | 0,730      | 0,350                                 | 1,550                                 | 0,490      | 0,230                                 | 1,030                                 | 0,570      | 0,290                                 | 1,100                                 | 0,500      | 0,190                                 | 1,270                                 |
| Headache                     | 1,270      | 1,010                                 | 1,590                                 | 1,150      | 0,810                                 | 1,640                                 | 1,440      | 1,060                                 | 1,940                                 | 1,410      | 1,040                                 | 1,900                                 | 1,060      | 0,740                                 | 1,530                                 |
| Dizziness                    | 0,810      | 0,620                                 | 1,060                                 | 0,980      | 0,660                                 | 1,440                                 | 0,700      | 0,490                                 | 1,010                                 | 0,700      | 0,500                                 | 0,980                                 | 1,060      | 0,680                                 | 1,640                                 |
| Skin reactions               | 1,080      | 0,630                                 | 1,880                                 | 1,230      | 0,590                                 | 2,570                                 | 1,060      | 0,490                                 | 2,300                                 | 1,110      | 0,550                                 | 2,260                                 | 1,150      | 0,520                                 | 2,580                                 |
| GI symptoms                  | 0,290      | 0,140                                 | 0,600                                 | 0,470      | 0,190                                 | 1,160                                 | 0,250      | 0,090                                 | 0,710                                 | 0,290      | 0,120                                 | 0,700                                 | 0,400      | 0,140                                 | 1,170                                 |
| Loss of appetite             | 1,650      | 0,510                                 | 5,330                                 | 1,730      | 0,470                                 | 6,270                                 | 1,780      | 0,310                                 | 10,210                                | 1,390      | 0,360                                 | 5,380                                 | 1,730      | 0,360                                 | 8,170                                 |
| Lung disease                 | 0,440      | 0,180                                 | 1,050                                 | 0,640      | 0,210                                 | 1,980                                 | 0,460      | 0,150                                 | 1,390                                 | 1,190      | 0,290                                 | 4,860                                 | 0,380      | 0,140                                 | 1,000                                 |
| Hypertension                 | 0,910      | 0,700                                 | 1,170                                 | 0,940      | 0,640                                 | 1,360                                 | 0,880      | 0,620                                 | 1,250                                 | 0,790      | 0,490                                 | 1,260                                 | 0,910      | 0,650                                 | 1,260                                 |
| Heart diseases               | 0,640      | 0,410                                 | 1,000                                 | 0,490      | 0,250                                 | 0,950                                 | 0,900      | 0,500                                 | 1,620                                 | 0,860      | 0,400                                 | 1,860                                 | 0,560      | 0,330                                 | 0,960                                 |
| Diabetes                     | 0,750      | 0,460                                 | 1,200                                 | 0,560      | 0,260                                 | 1,240                                 | 0,930      | 0,530                                 | 1,650                                 | 0,790      | 0,310                                 | 2,020                                 | 0,730      | 0,430                                 | 1,240                                 |
| Kidney diseases              | 0,960      | 0,420                                 | 2,220                                 | 1,230      | 0,410                                 | 3,660                                 | 0,960      | 0,330                                 | 2,820                                 | 1,190      | 0,290                                 | 4,860                                 | 0,990      | 0,400                                 | 2,480                                 |
| Allergies                    | 0,460      | 0,230                                 | 0,910                                 | 0,450      | 0,180                                 | 1,090                                 | 0,660      | 0,260                                 | 1,690                                 | 0,500      | 0,220                                 | 1,140                                 | 0,580      | 0,210                                 | 1,590                                 |
| Asthma                       | 0,680      | 0,420                                 | 1,110                                 | 0,810      | 0,430                                 | 1,510                                 | 0,630      | 0,310                                 | 1,300                                 | 0,460      | 0,230                                 | 0,930                                 | 1,210      | 0,620                                 | 2,370                                 |

|                |                                                                     |
|----------------|---------------------------------------------------------------------|
| <b>LEGEND:</b> |                                                                     |
|                | significant odds ratio higher than 1 (potential risk factor)        |
|                | significant odds ratio smaller than 1 (potential protective factor) |
